# Supplementary material for: Type-II tunable SiC/InSe heterostructures under an electric field and biaxial strain
Source: Royal Society of Chemistry journal article supplement (doi:10.1039/d0cp00291g), 2020-01-01
Supplement: d0cp00291g1.pdf [file d0cp00291g1.pdf]

## Type-II Tunable SiC/InSe Heterostructure in Electric Field and Biaxial Strain

Zhu Wang,<sup>a</sup> Yan Zhang,<sup>a</sup> Xing Wei,<sup>a</sup> Tingting Guo,<sup>a</sup> Jibin Fan,<sup>a</sup> Lei Ni,<sup>a</sup> Yijun Weng,<sup>a</sup>  
Zhengdi Zha,<sup>a</sup> Jian Liu,<sup>b</sup> Ye Tian,<sup>c</sup> Ting Li,<sup>a</sup> Li Duan<sup>a,\*</sup>

<sup>a</sup> School of Materials Science and Engineering, Chang'an University, Xi'an, 710064, China

<sup>b</sup> School of Physics, Shandong University, Jinan 250100, China

<sup>c</sup> Institute of Physics, Chinese Academy of Sciences, Beijing 100190, China

\*Corresponding author.

E-mail address: [liduan@chd.edu.cn](mailto:liduan@chd.edu.cn).

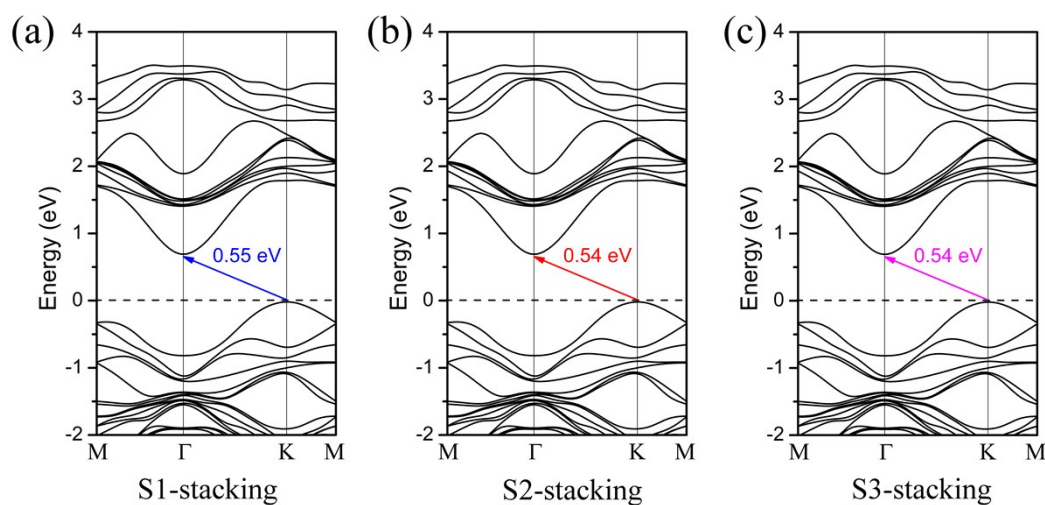

**Fig. S1.** Projected band structure of S1-stacking (a), S2- stacking (b) and S3- stacking (c).

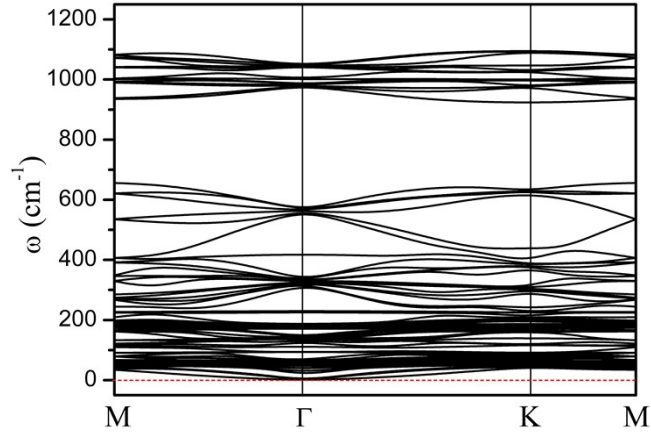

**Fig. S2.** The phonon dispersion of SiC/InSe heterostructure ( $d = 3.34 \text{ \AA}$ ).

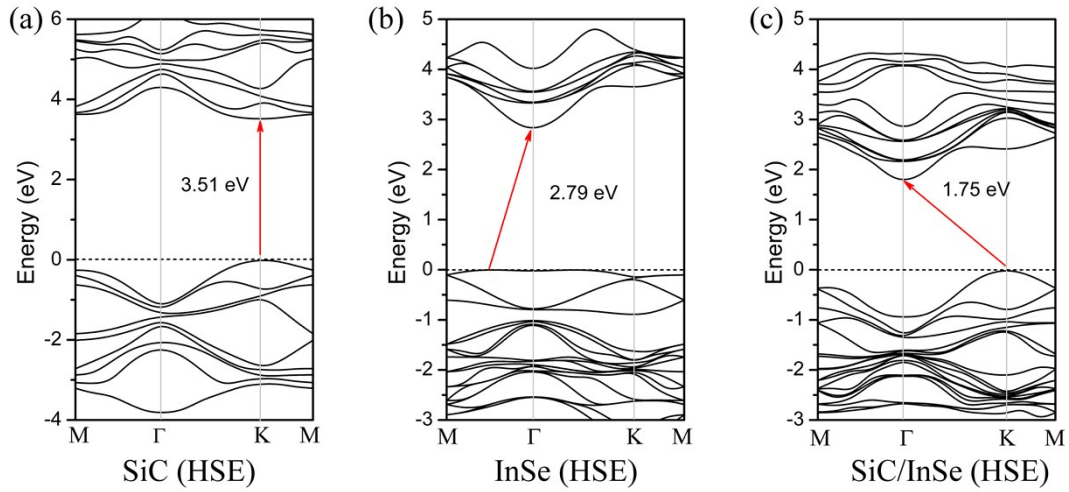

**Fig. S3.** (a)-(c) Projected energy band structures of the freestanding SiC, InSe monolayer, and the SiC/InSe heterostructure calculated by HSE06.

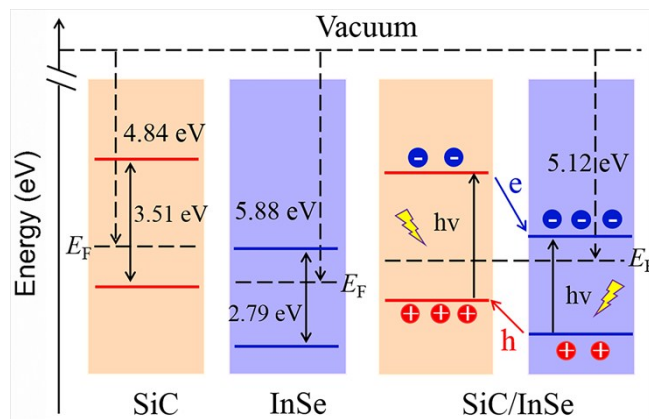

**Fig. S4.** Band alignment (HSE06) of the SiC, InSe single layers, and SiC/InSe

heterostructure, with the vacuum level being used as a reference.
